# Supplementary material for: MoO3nanowire growth on VO2/WO3for thermochromic applications
Source: Royal Society of Chemistry journal article supplement (doi:10.1039/d3cp05942a), 2024-01-01
Supplement: d3cp05942a1.pdf [file d3cp05942a1.pdf]

## Additional Information

### MoO<sub>3</sub> Nanowire Growth on VO<sub>2</sub>/WO<sub>3</sub> for Thermo-chromic Applications

Amina Houimi<sup>1,2</sup>, Mohamed A. Basyooni-M. Kabatas<sup>1,3,4\*</sup>, Mucahit Yilmaz<sup>5</sup> and Yasin  
Ramazan Eker<sup>1,6</sup>

<sup>1</sup>Science and Technology Research and Application Center (BITAM), Necmettin Erbakan University, Konya 42090, Turkey

<sup>2</sup>UNAM, Institute of Materials Science and Nanotechnology, Bilkent University, Ankara 068000, Turkey

<sup>3</sup>Dynamics of Micro and Nano Systems Group, Department of Precision and Microsystems Engineering, Delft University of Technology, Mekelweg 2, 2628 CD Delft, The Netherlands

<sup>4</sup>Solar and Space Research Department, National Research Institute of Astronomy and Geophysics, Cairo, Egypt

<sup>5</sup>Department of Fundamental Science, Necmettin Erbakan University, Konya, Turkiye

<sup>6</sup>Department of Basic Sciences, Faculty of Engineering, Necmettin Erbakan University, Konya 42090, Turkey

\*Corresponding author: Mohamed A. Basyooni-M. Kabatas (m.kabatas@tudelft.nl & m.a.basyooni@gmail.com)

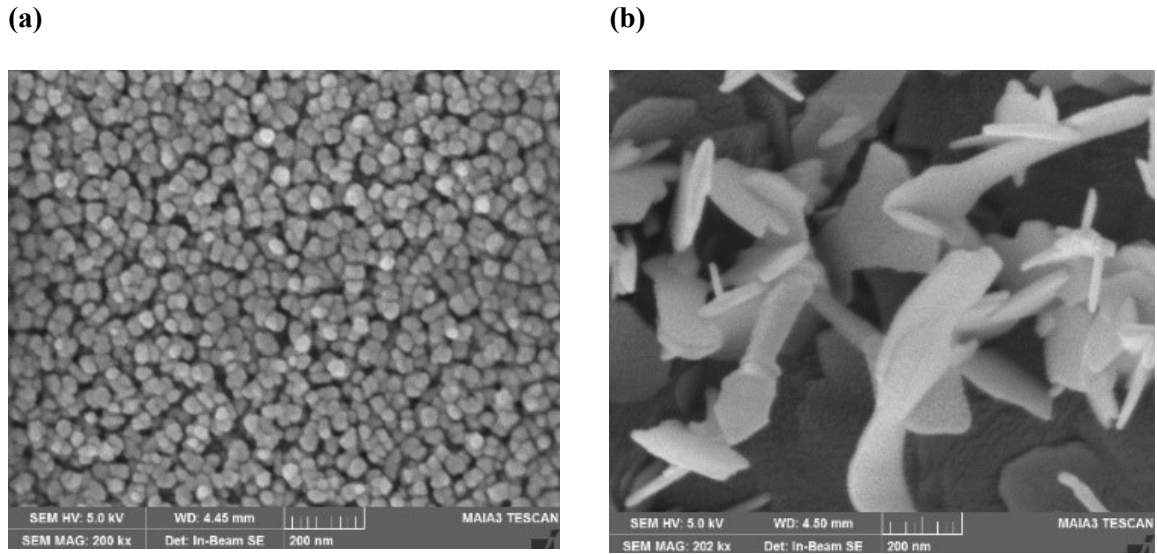

Fig. S1. SEM surface morphology of (a) VO<sub>2</sub> and (b) MoO<sub>3</sub> thin films.

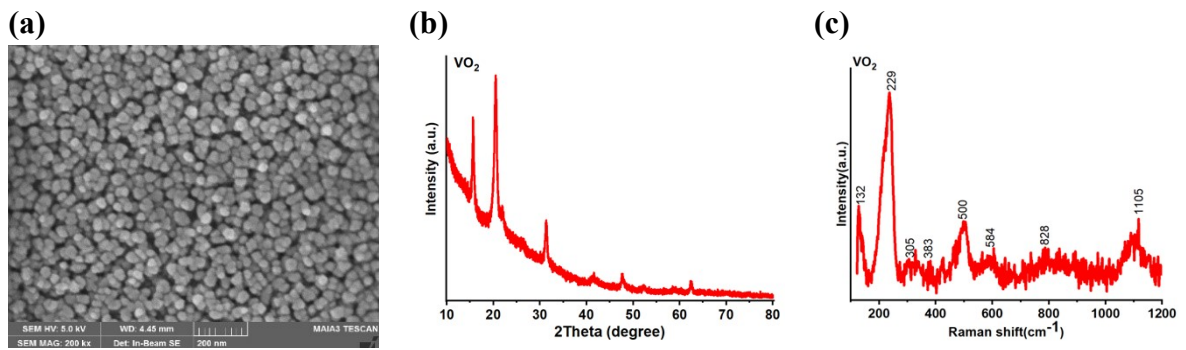

Fig. S2 shows (a) SEM surface morphology, (b) XRD, and (c) Raman spectra of the monoclinic structure of VO<sub>2</sub>.

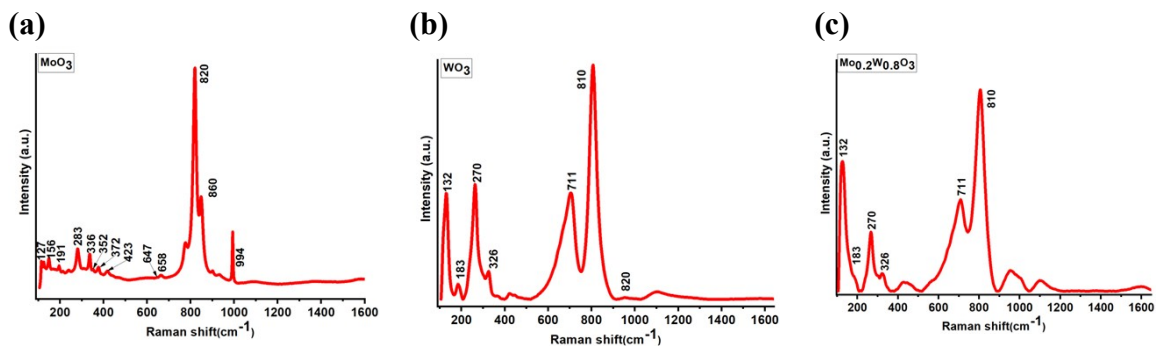

Fig. S3 shows Raman spectra of (a) MoO<sub>3</sub>, (b) WO<sub>3</sub>, and (c) Mo<sub>0.2</sub>W<sub>0.8</sub>O<sub>3</sub> Thin films.
